# Supplementary figures and images for: Raman spectroscopic studies of defect structures and phase transition in hyper-stoichiometric UO2+x
Source: Royal Society of Chemistry journal article supplement (doi:10.1039/b925495a), 2010-01-01

# Raman spectra of an extensive series of spot analyses

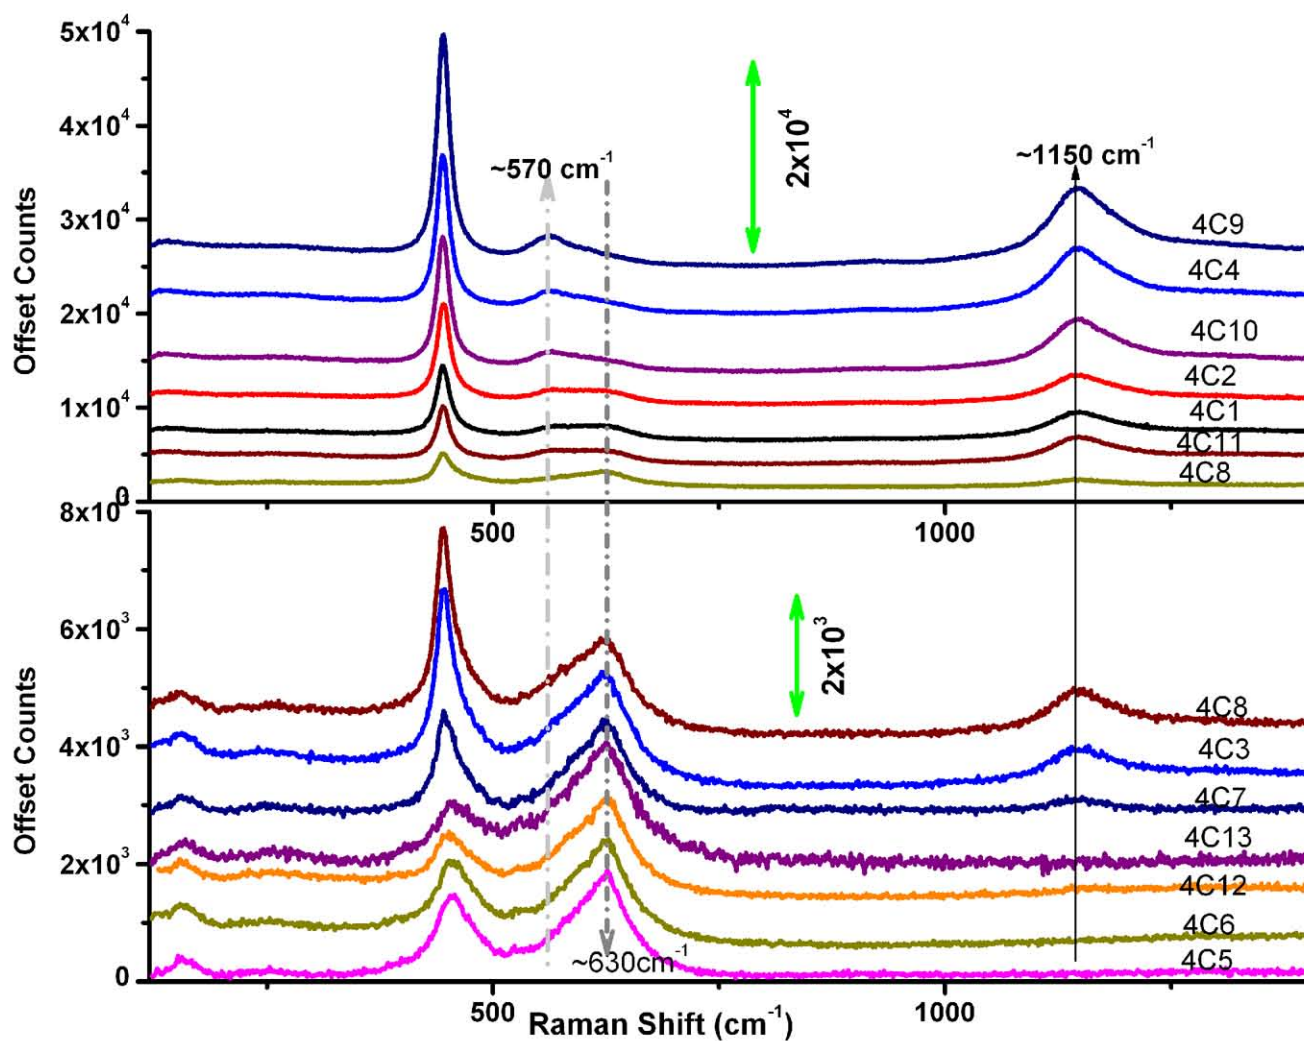

Supplement: b925495a.pdf [file b925495a.pdf]
